# Supplementary material for: Ammonium based stabilizers effectively counteract urea-induced denaturation in a small protein: insights from molecular dynamics simulations
Source: Royal Society of Chemistry journal article supplement (doi:10.1039/c7ra10712a), 2017-01-01
Supplement: c7ra10712a1.pdf [file c7ra10712a1.pdf]

## SUPPORTING INFORMATION

for

### **Ammonium Based stabilizers Effectively Counteract the Urea – Conferred Denaturation in a Small Protein: Insights from Molecular Dynamics Simulations**

Soham Sarkar, Soumadwip Ghosh and Rajarshi Chakrabarti\*

\*Email: [rajarshi@chem.iitb.ac.in](mailto:rajarshi@chem.iitb.ac.in)

Department of Chemistry, Indian Institute of Technology Bombay, Powai, Mumbai – 400076, India

#### AUTHOR INFORMATION

\*Corresponding author

Mailing Address: Department of Chemistry, Indian Institute of Technology Bombay, Room no. 215,  
Powai, Mumbai-400076, India

Email: [rajarshi@chem.iitb.ac.in](mailto:rajarshi@chem.iitb.ac.in)

Phone: + 91-022-2576 7192

Fax : + 91-022-2576 7152

| <b>Serial number</b> | <b>Ionic species</b> | <b>Atom name</b> | <b>Partial charge</b> |
|----------------------|----------------------|------------------|-----------------------|
| 1                    | TEA                  | N                | -0.1658               |
| 2                    | TEA                  | C                | -0.4425               |
| 3                    | TEA                  | C                | -0.6560               |
| 4                    | TEA                  | H                | 0.2520                |
| 5                    | TEA                  | H                | 0.2760                |
| 6                    | TEA                  | H                | 0.2543                |
| 7                    | TEA                  | H                | 0.2670                |
| 8                    | TEA                  | H                | 0.2277                |
| 9                    | TEA                  | C                | -0.1595               |
| 10                   | TEA                  | C                | -0.8210               |
| 11                   | TEA                  | H                | 0.2303                |
| 12                   | TEA                  | H                | 0.2450                |
| 13                   | TEA                  | H                | 0.2622                |
| 14                   | TEA                  | H                | 0.2650                |
| 15                   | TEA                  | H                | 0.2112                |
| 16                   | TEA                  | C                | -0.4373               |
| 17                   | TEA                  | C                | -0.5282               |
| 18                   | TEA                  | H                | 0.2379                |
| 19                   | TEA                  | H                | 0.2731                |
| 20                   | TEA                  | H                | 0.2594                |
| 21                   | TEA                  | H                | 0.2481                |
| 22                   | TEA                  | H                | 0.2324                |
| 23                   | TEA                  | H                | 0.4684                |

Table S1. Partial charges on different atoms of triethylammonium (TEA) ions constituting the TEAA molecule.

| <b>Serial number</b> | <b>Ionic species</b> | <b>Atom name</b> | <b>Partial charge</b> |
|----------------------|----------------------|------------------|-----------------------|
| 1                    | ACE                  | C                | -0.7072               |
| 2                    | ACE                  | H                | 0.1873                |
| 3                    | ACE                  | H                | 0.1893                |
| 4                    | ACE                  | H                | 0.2014                |
| 5                    | ACE                  | C                | 0.4021                |
| 6                    | ACE                  | O                | -0.5632               |
| 7                    | ACE                  | O                | -0.7098               |

Table S2. Partial charges on different atoms of acetate (ACE) ions constituting the TEAA molecule.

| <b>Serial number</b> | <b>Ionic species</b> | <b>Atom name</b> | <b>Partial charge</b> |
|----------------------|----------------------|------------------|-----------------------|
| 1                    | Choline              | N                | -0.8625               |
| 2                    | Choline              | C                | -0.2838               |
| 3                    | Choline              | C                | -0.0605               |
| 4                    | Choline              | H                | 0.2869                |
| 5                    | Choline              | H                | 0.2870                |
| 6                    | Choline              | H                | 0.2011                |
| 7                    | Choline              | H                | 0.2012                |
| 8                    | Choline              | C                | -0.3634               |
| 9                    | Choline              | H                | 0.2806                |
| 10                   | Choline              | H                | 0.2792                |
| 11                   | Choline              | H                | 0.2806                |
| 12                   | Choline              | C                | -0.3639               |
| 13                   | Choline              | H                | 0.2861                |
| 14                   | Choline              | H                | 0.2627                |
| 15                   | Choline              | H                | 0.2793                |
| 16                   | Choline              | C                | -0.3641               |
| 17                   | Choline              | H                | 0.2861                |
| 18                   | Choline              | H                | 0.2793                |
| 19                   | Choline              | H                | 0.2627                |
| 20                   | Choline              | O                | -0.6798               |
| 21                   | Choline              | H                | 0.5053                |

Table S3. Partial charges on different atoms of Choline ions constituting the ChCl molecule.

| <b>Bond parameters</b>      |                      |                                                              |                                     |
|-----------------------------|----------------------|--------------------------------------------------------------|-------------------------------------|
| <b>Bond type</b>            | <b>Ionic species</b> | <b>Force constant (kJ mol<sup>-1</sup> nm<sup>-2</sup>)</b>  | <b>Equilibrium bond length (nm)</b> |
| N-H                         | TEA                  | 363171                                                       | 0.100                               |
| N-C                         | TEA                  | 307105                                                       | 0.147                               |
| C-H                         | TEA                  | 284512                                                       | 0.107                               |
| C-C                         | TEA                  | 224262                                                       | 0.154                               |
| C-O                         | ACE                  | 548960                                                       | 0.125                               |
| C-H                         | ACE                  | 284512                                                       | 0.109                               |
| C-C                         | ACE                  | 265265                                                       | 0.152                               |
| <b>Angle parameters</b>     |                      |                                                              |                                     |
| <b>Angle type</b>           | <b>Ionic species</b> | <b>Force constant (kJ mol<sup>-1</sup> rad<sup>-2</sup>)</b> | <b>Equilibrium angle (degree)</b>   |
| N-C-H (alkyl hydrogen)      | TEA                  | 292.880                                                      | 109.515                             |
| N-C-C                       | TEA                  | 669.440                                                      | 109.457                             |
| C-C-H                       | TEA                  | 313.800                                                      | 109.432                             |
| C-N-H (N-terminal hydrogen) | TEA                  | 292.880                                                      | 109.437                             |
| H-C-C                       | ACE                  | 292.900                                                      | 109.500                             |
| H-C-H                       | ACE                  | 276.100                                                      | 107.800                             |
| O-C-C                       | ACE                  | 585.800                                                      | 117.000                             |
| O-C-O                       | ACE                  | 669.400                                                      | 126.000                             |
| <b>Dihedral parameters</b>  |                      |                                                              |                                     |
| <b>Dihedral type</b>        | <b>Ionic species</b> | <b>Phase (degree)</b>                                        | <b>Multiplicity</b>                 |
| H-N-C-C                     | TEA                  | 0                                                            | 3                                   |
| O-C-C-H                     | ACE                  | 0                                                            | 3                                   |

Table S4. Bonded interaction parameters for the molecule TEAA compatible with the OPLS-AA force field.

| <b>Bond parameters</b>     |                      |                                                              |                                     |
|----------------------------|----------------------|--------------------------------------------------------------|-------------------------------------|
| <b>Bond type</b>           | <b>Ionic species</b> | <b>Force constant (kJ mol<sup>-1</sup> nm<sup>-2</sup>)</b>  | <b>Equilibrium bond length (nm)</b> |
| O-H                        | Choline              | 463000                                                       | 0.095                               |
| C-O                        | Choline              | 268000                                                       | 0.141                               |
| C-H                        | Choline              | 285000                                                       | 0.109                               |
| C-C                        | Choline              | 224000                                                       | 0.153                               |
| C-N                        | Choline              | 307000                                                       | 0.147                               |
| <b>Angle parameters</b>    |                      |                                                              |                                     |
| <b>Angle type</b>          | <b>Ionic species</b> | <b>Force constant (kJ mol<sup>-1</sup> rad<sup>-2</sup>)</b> | <b>Equilibrium angle (degree)</b>   |
| C-N-C                      | Choline              | 418.4                                                        | 113.0                               |
| C-C-H (alkane Hydrogen)    | Choline              | 313.8                                                        | 110.7                               |
| H-C-H                      | Choline              | 276.1                                                        | 107.8                               |
| N-C-H                      | Choline              | 292.9                                                        | 109.5                               |
| N-C-C                      | Choline              | 669.4                                                        | 111.2                               |
| H-C-O                      | Choline              | 292.9                                                        | 109.5                               |
| C-C-O                      | Choline              | 418.4                                                        | 109.5                               |
| C-O-H (alcohol hydrogen)   | Choline              | 460.2                                                        | 108.5                               |
| <b>Dihedral parameters</b> |                      |                                                              |                                     |
| <b>Dihedral type</b>       | <b>Ionic species</b> | <b>Phase (degree)</b>                                        | <b>Multiplicity</b>                 |
| H-O-C-H                    | Choline              | 0                                                            | 3                                   |
| H-O-C-C                    | Choline              | 0                                                            | 3                                   |
| O-C-C-H                    | Choline              | 0                                                            | 3                                   |
| O-C-C-N                    | Choline              | 0                                                            | 3                                   |
| H-C-C-H                    | Choline              | 0                                                            | 3                                   |
| H-C-C-N                    | Choline              | 0                                                            | 3                                   |
| H-C-N-C                    | Choline              | 0                                                            | 3                                   |
| C-C-N-C                    | Choline              | 0                                                            | 3                                   |

Table S5. Bonded interaction parameters for the REL ion compatible with the OPLS-AA force field.

| System         | $N_p$ | $N_u$ | $N_{IL}$<br>(TEA<br>and<br>ACE) | $N_{ChCl}$<br>(REL<br>and<br>Cl) | $N_w$ | V<br>(nm <sup>3</sup> ) | d<br>(kg/m <sup>3</sup> ) | T (K)               | P (bar)             |
|----------------|-------|-------|---------------------------------|----------------------------------|-------|-------------------------|---------------------------|---------------------|---------------------|
| PW             | 1     | 0     | 0                               | 0                                | 4485  | 145.651<br>±<br>0.0016  | 969.862<br>± 0.011        | 329.998 ±<br>0.0013 | 1.1105 ±<br>0.0003  |
| PUW            | 1     | 680   | 0                               | 0                                | 2300  | 125.214<br>±<br>0.0014  | 1148.17<br>±<br>0.0130    | 329.965<br>± 0.0009 | 1.134 ± 0.0004      |
| PUILW<br>(5:1) | 1     | 680   | 136                             | 0                                | 1179  | 123.126<br>±<br>0.0052  | 1186.67<br>± 0.05         | 329.94 ±<br>0.0012  | 1.132 ± 0.0008      |
| PUILW<br>(2:1) | 1     | 680   | 340                             | 0                                | 2522  | 124.604<br>±<br>0.0068  | 1126.46<br>± 0.035        | 329.948 ±<br>0.0008 | 1.0746 ± 0.0001     |
| PChCIW (5:1)   | 1     | 680   | 0                               | 136                              | 1418  | 126.182<br>±<br>0.0035  | 1181.98<br>± 0.033        | 329.947 ±<br>0.0009 | 1.1287 ± 0.0003     |
| PChCIW (2:1)   | 1     | 680   | 0                               | 340                              | 1000  | 157.051<br>±<br>0.009   | 1169.72<br>±<br>0.067     | 329.937 ±<br>0.0007 | 1.10456 ±<br>0.0003 |

Table S6. Brief overview of all the six simulated systems.  $N_p$ ,  $N_u$ ,  $N_{IL}$ ,  $N_{ChCl}$ , and  $N_w$  refer to the number of small protein HP-36, urea, ions from TEAA, ions from the ChCl and water molecules respectively. Systems PW, PUW, PUILW (5:1), PUILW (2:1), PChCIW (5:1) and PChCIW (2:1) denote the small protein in pure water, in aqueous urea, in mixed urea-TEAA (lower concentration), in mixed urea-TEAA (higher concentration), in mixed urea-ChCl (lower concentration) and in mixed urea-TEAA (higher concentration). V, d, T, P represent the cubic box volume, density, temperature and pressure of each of the simulated systems respectively. Standard errors provided are calculated from two independent simulations for each system.
